# Supplementary material for: Population-based self-sampling under primary care conditions – a possible approach for cervical cancer screening in Indonesia (IndoCerCa study)
Source: Research Square preprint supplement (doi:10.21203/rs.3.rs-7429458/v1), 2025-09-11
Supplement: Supplementary file 1 [file b0b90c721673362e15727a5d.docx]

## Population-based self-sampling under primary care conditions – a possible approach for cervical cancer screening in Indonesia (IndoCerCa study)

## Supplementary Tables

Suppl. Table 1: Number of puskesmas with assigned devices and rural/urban distribution

| **Device Group** |  | **Rural** | **Urban** | **Total** |
| --- | --- | --- | --- | --- |
| I (urine) | UriSponge_TS | 3 | 2 | 5 |
| II (swab) | IFU VibaBrush | 3 | 2 | 5 |
| III (urine) | Colli-Pee 10 mL UCM | 3 | 2 | 5 |
| IV (swab) | MSwab_TS | 4 | 2 | 6 |
| **Total** |  | **13** | **8** | **21** |

Suppl. Table 2: Coefficients and odds ratios of regression analysis

| CIN+ | Coefficient B B | SE | Wald | d(F) | p | Odds Ratio | | 95% CI for Odds Ratio | | | |
| --- | --- | --- | --- | --- | --- | --- | --- | --- | --- | --- | --- |
| lower limit | | upper limit | |
| Constant Term | -45,471 | 2013,025 | 0,001 | 1 | 0,982 | |  | |  | |  | |
| Rural/Urban | 0,255 | 0,875 | 0,085 | 1 | 0,771 | | 1,290 | | 0,232 | | 7,167 | |
| <35 years | -2,038 | 1,304 | 2,440 | 1 | 0,118 | | 0,130 | | 0,010 | | 1,680 | |
| 35-39 years | -2,486 | 1,476 | 2,837 | 1 | 0,092 | | 0,083 | | 0,005 | | 1,502 | |
| 40-44 years | -0,198 | 1,103 | 0,032 | 1 | 0,858 | | 0,820 | | 0,094 | | 7,126 | |
| 45-49 years | -16,302 | 1183,381 | 0,000 | 1 | 0,989 | | <10-8 | | 0,000 | |  | |
| HPV neg | 13,230 | 1,201 | 121,341 | 1 | 0,000 | | >106 | | >106 | | >106 | |
| HPV16 | 31,573 | 1183,381 | 0,001 | 1 | 0,979 | | >1013 | | 0,000 | |  | |
| HPV18 | 17,358 | 1,185 | 214,533 | 1 | 0,000 | | >108 | | >108 | | >108 | |
| Other HR HPV | 15,704 | 0,000 |  | 1 |  | | >107 | | >107 | | >107 | |
| Education low | 30,640 | 2013,025 | 0,000 | 1 | 0,988 | | >1013 | | 0,000 | | .c | |
| Married | -0,695 | 0,000 |  | 1 |  | | 0,499 | | 0,499 | | 0,499 | |
| Separated | 14,351 | 7975,363 | 0,000 | 1 | 0,999 | | >107 | | 0,000 | | .c | |
